# Supplementary material for: The extracellular EXO protein mediates cell expansion in Arabidopsis leaves
Source: PubMed Central journal article supplement (PMC2661892; doi:10.1186/1471-2229-9-20), 2009-02-13
Supplement: 1471-2229-9-20-S1.pdf [file 1471-2229-9-20-S1.pdf]

## Supplementary material

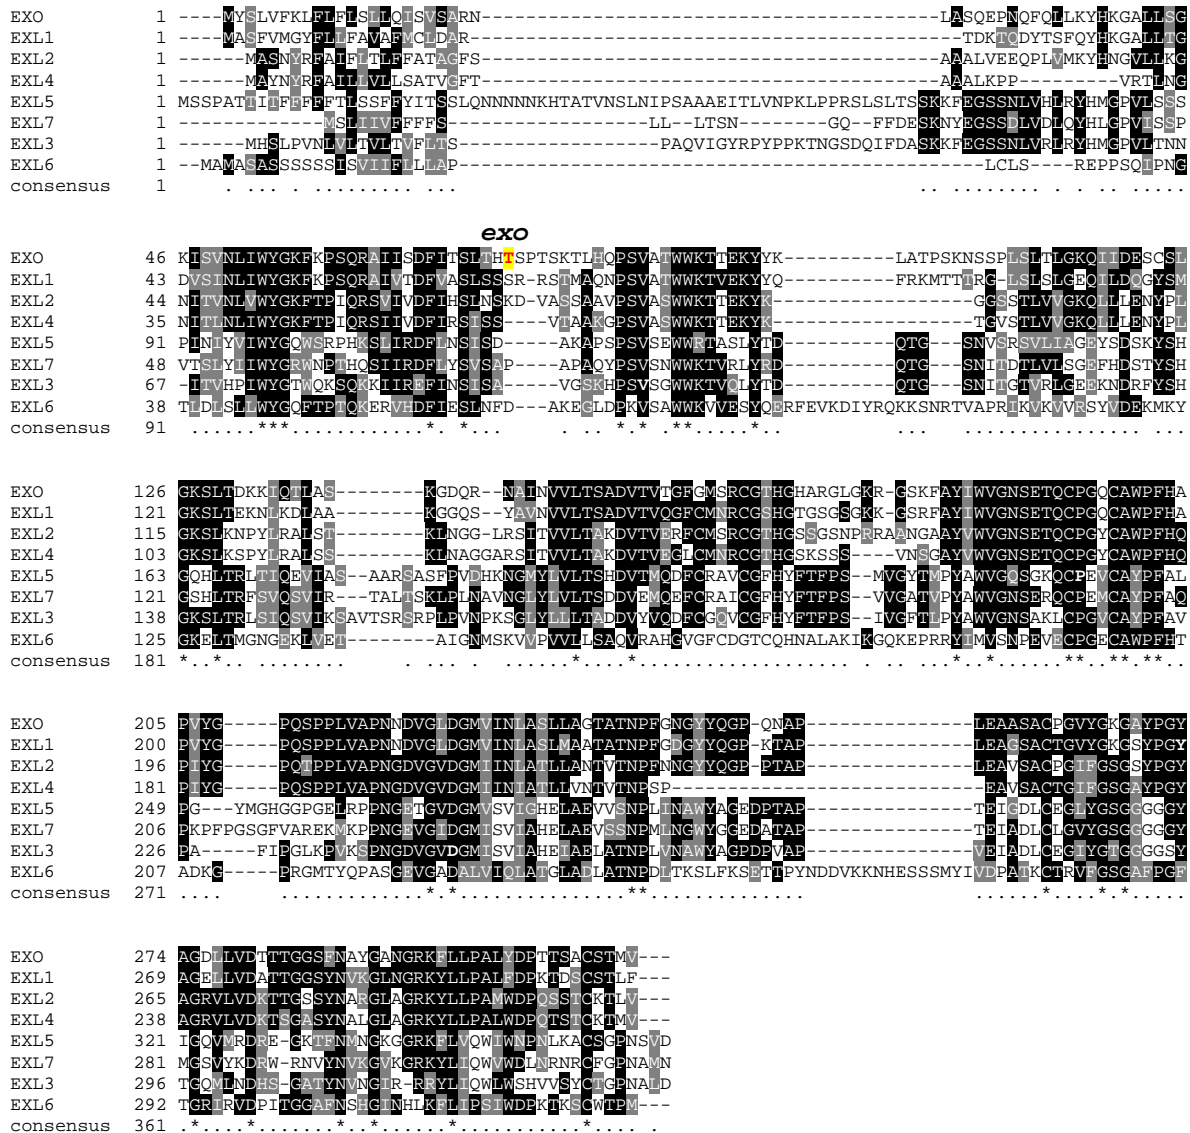

**Figure S1. Primary structures of the EXO and EXL proteins.**

Coding sequences were derived from full-length cDNAs. The *EXL6* gene has an intron (data not shown), all other genes feature one continuous exon. The coloured amino acid indicates the position of the T-DNA insertion in the *EXO* gene. Sequences were aligned using the BCM Search Launcher (<http://searchlauncher.bcm.tmc.edu/>) and BOXSHADE tools ([http://www.ch.embnet.org/software/BOX\\_form.html](http://www.ch.embnet.org/software/BOX_form.html)).

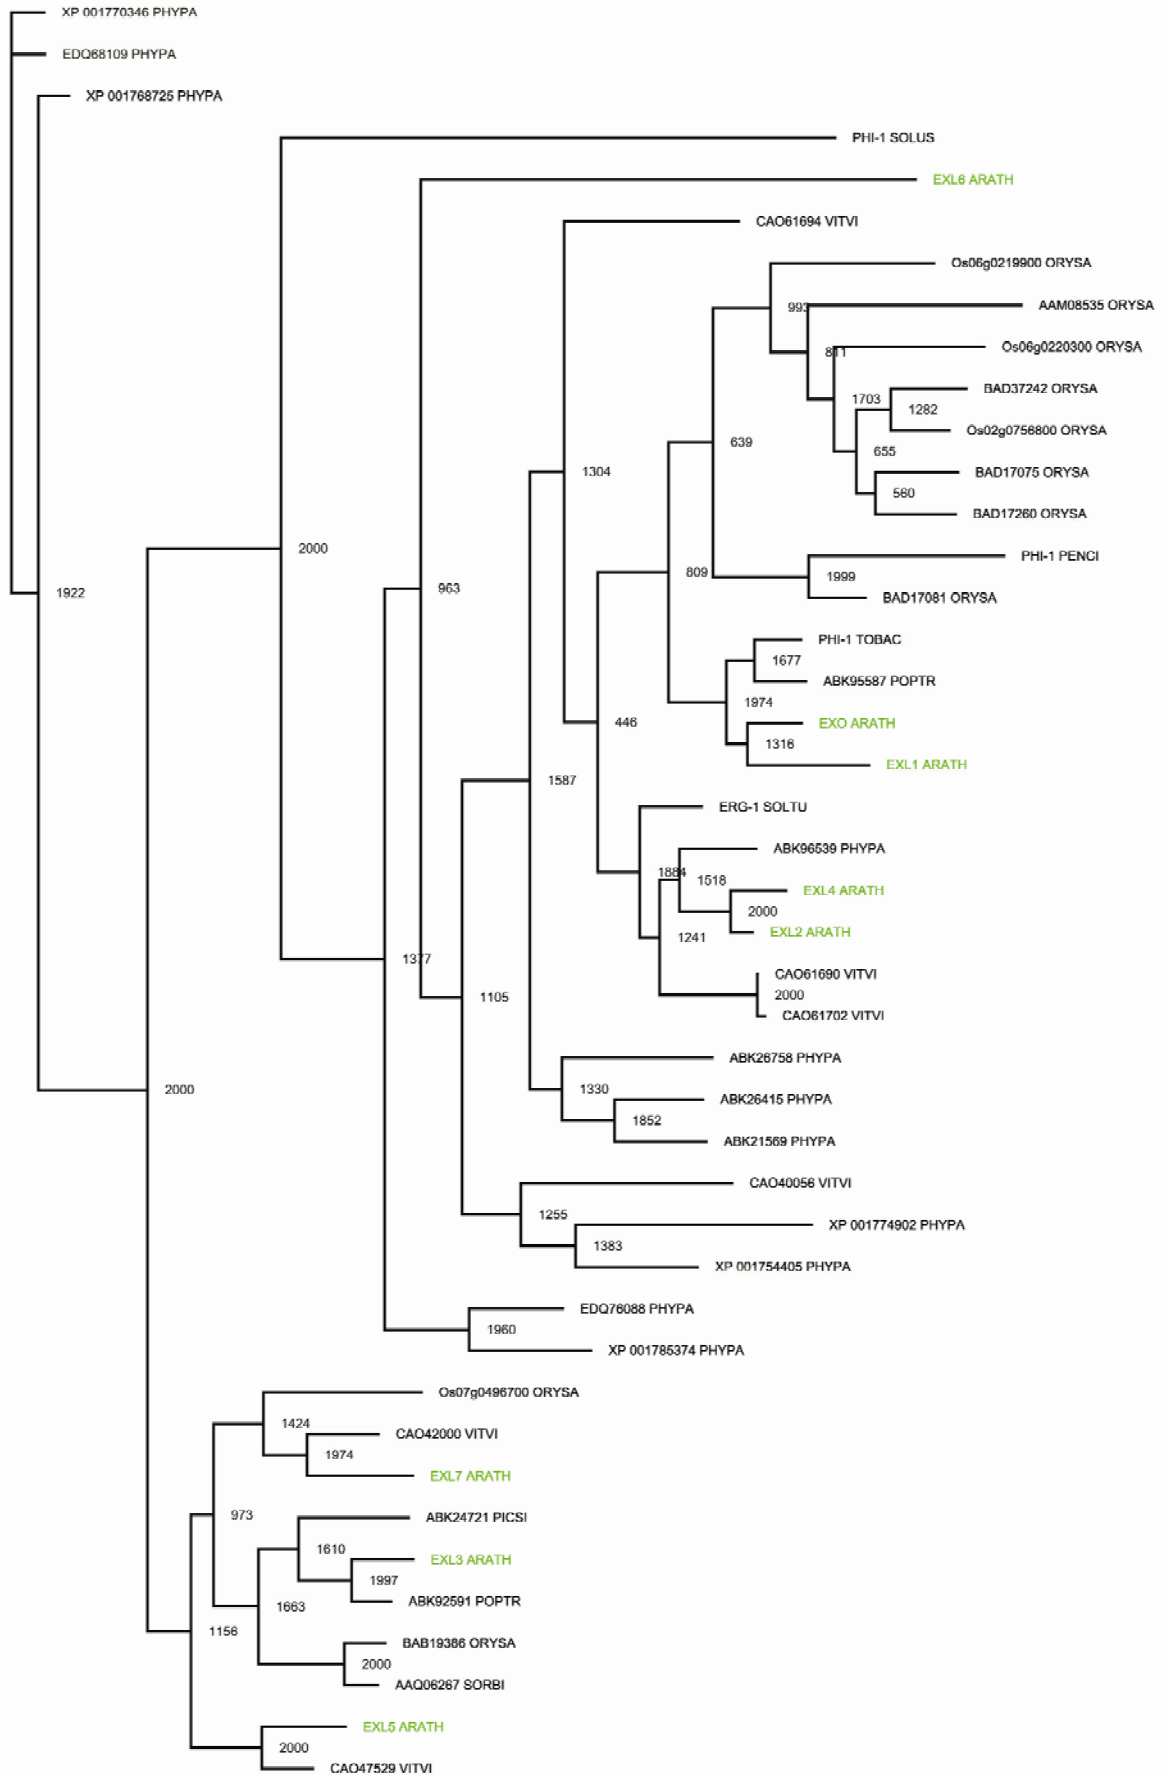

**Figure S2. Phylogenetic tree of PHI1/EXO sequence relationships.**

EXO homologs were identified using BLAST searches (see Additional file 2). Fragmentary sequences were discarded. Multiple alignments were created by means of the ClustalW2 tool (<http://www.ebi.ac.uk/Tools/clustalw2/index.html>). Sequences were transformed into the PHYLIP format by means of the GeneDoc software (<http://www.nrbsc.org/gfx/genedoc/index.html>). The PhyML software package (*Systematic Biology* 2003, 52: 696-704) with the JTT model for proteins was used to create the phylogenetic tree. Branch support was estimated through 2000 bootstrap samples. TreeView (*Computer Applications in the Biosciences* 1996, 12: 357-358) was used to visualize the tree file.

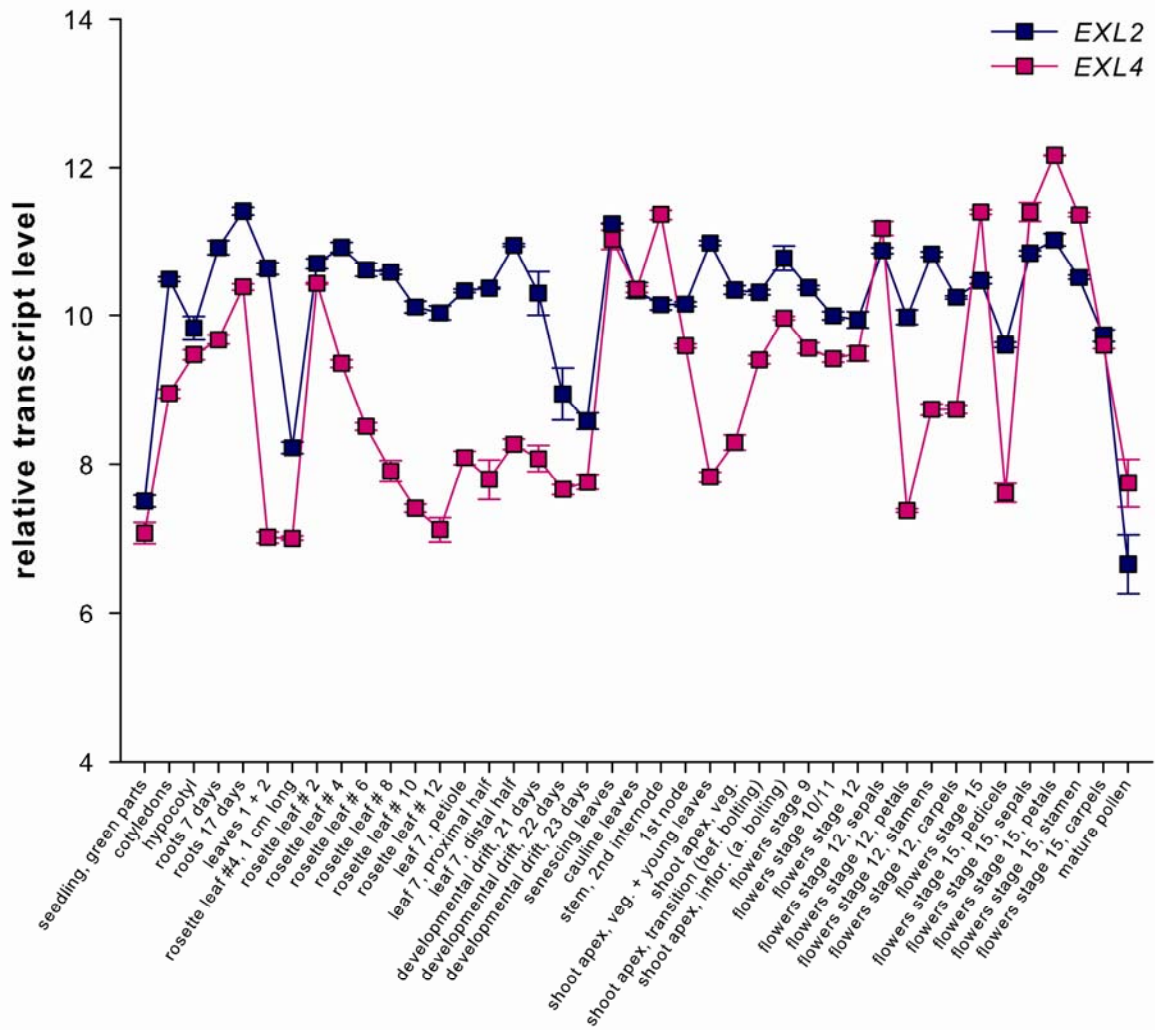

**Figure S3. *EXL2* and *EXL4* expression in different organs and developmental stages.**

Wild-type expression profiles of the development series (*Nat Genet* 2005, **37**: 501-506) were downloaded from AtGenExpress and normalized using RMA-Express (*Bioinformatics* 2003, **19**: 185-193). The mean and SD of three replicates are shown.

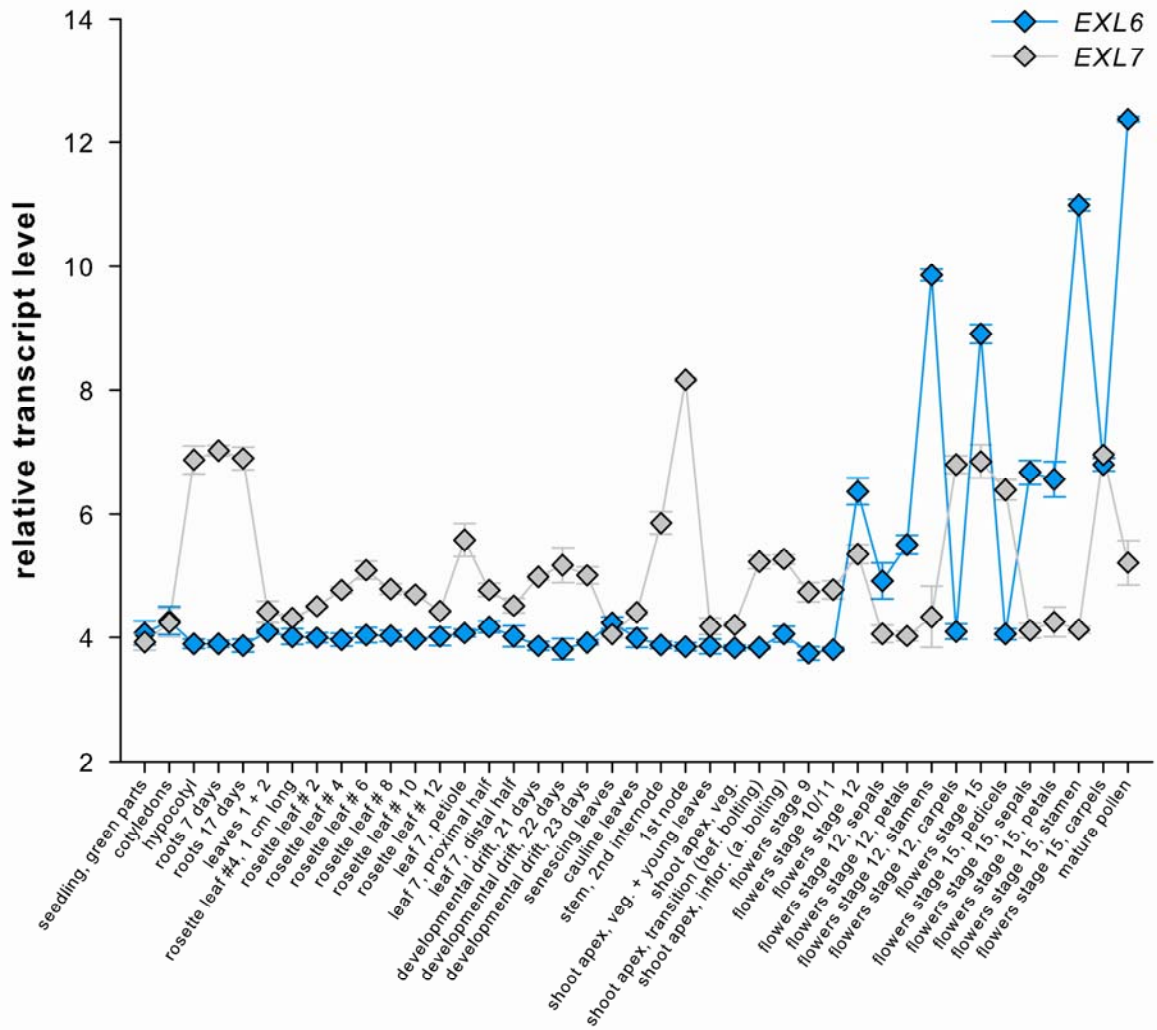

**Figure S4. *EXL6* and *EXL7* expression in different organs and developmental stages.**

Wild-type expression profiles of the development series (*Nat Genet* 2005, **37**: 501-506) were downloaded from AtGenExpress and normalized using RMA-Express (*Bioinformatics* 2003, **19**: 185-193). The mean and SD of three replicates are shown.

**Table S1. *EXO* and *EXL* gene expression in different organs and developmental stages.**

| <b>All profiles</b>              | EXO           | EXL1          | EXL2          | EXL3          | EXL4    | EXL5    | EXL6    | EXL7 |
|----------------------------------|---------------|---------------|---------------|---------------|---------|---------|---------|------|
| EXO                              | -             |               |               |               |         |         |         |      |
| EXL1                             | <b>0,7070</b> | -             |               |               |         |         |         |      |
| EXL2                             | 0,2601        | 0,4843        | -             |               |         |         |         |      |
| EXL3                             | <b>0,7014</b> | 0,3615        | 0,0547        | -             |         |         |         |      |
| EXL4                             | -0,2984       | 0,0174        | <b>0,5080</b> | -0,2117       | -       |         |         |      |
| EXL5                             | <b>0,7592</b> | <b>0,5016</b> | -0,0237       | <b>0,7780</b> | -0,5258 | -       |         |      |
| EXL6                             | -0,2063       | 0,0979        | 0,0841        | -0,4850       | 0,1326  | -0,3376 | -       |      |
| EXL7                             | 0,0789        | 0,0064        | -0,2395       | 0,2986        | 0,1322  | 0,0150  | -0,2366 | -    |
| <b>Without flower and pollen</b> |               |               |               |               |         |         |         |      |
|                                  | EXO           | EXL1          | EXL2          | EXL3          | EXL4    | EXL5    | EXL6    | EXL7 |
| EXO                              | -             |               |               |               |         |         |         |      |
| EXL1                             | <b>0,8724</b> | -             |               |               |         |         |         |      |
| EXL2                             | 0,4487        | 0,4414        | -             |               |         |         |         |      |
| EXL3                             | <b>0,5818</b> | 0,4676        | 0,2387        | -             |         |         |         |      |
| EXL4                             | -0,2094       | -0,0031       | 0,4792        | 0,1044        | -       |         |         |      |
| EXL5                             | <b>0,8388</b> | <b>0,7717</b> | 0,1685        | <b>0,6386</b> | -0,3333 | -       |         |      |
| EXL6                             | 0,1868        | 0,2503        | 0,1960        | -0,0244       | -0,1447 | 0,2534  | -       |      |
| EXL7                             | -0,0751       | -0,0153       | -0,0470       | 0,2558        | 0,3718  | -0,1239 | -0,3748 | -    |

Wild-type expression profiles of the development series (*Nat Genet* 2005, **37**: 501-506) were downloaded from AtGenExpress and normalized using RMA-Express (*Bioinformatics* 2003, **19**: 185-193). Spearman's rank correlation coefficients were calculated for gene pairs based on the transcript levels in all profiles (top) or based on the transcript levels in profiles representing vegetative organs (bottom). Values above 0.5 are in bold type.

**Table S2. BR-induced *EXO*, *EXL1*, *EXL3*, and *EXL5* gene expression.**

|                    | <b>WT ± EBL 7h</b> |                | <b>WT ± CS 3h</b> |                |
|--------------------|--------------------|----------------|-------------------|----------------|
|                    | Experiment # 1     | Experiment # 2 | Experiment # 1    | Experiment # 2 |
|                    | SLR                | SLR            | SLR               | SLR            |
| <b><i>EXO</i></b>  | 1.8                |                | 3.2               | 3.1            |
| <b><i>EXL1</i></b> | 1.2                |                | 4.5               | 3.3            |
| <b><i>EXL3</i></b> | 0.8                |                | 1.9               | 1.2            |
| <b><i>EXL5</i></b> | 0.8                |                | 1.1               | 1.1            |

  

|                    | <b>det2 ± BL 1h</b> |                | <b>det2 ± BL 3h</b> |                |
|--------------------|---------------------|----------------|---------------------|----------------|
|                    | Experiment # 1      | Experiment # 2 | Experiment # 1      | Experiment # 2 |
|                    | SLR                 | SLR            | SLR                 | SLR            |
| <b><i>EXO</i></b>  | 2.0                 | 2.0            | 2.7                 | 2.6            |
| <b><i>EXL1</i></b> | 2.7                 | 3.2            | 4.1                 | 5.5            |
| <b><i>EXL3</i></b> |                     |                | 1.1                 | 1.3            |
| <b><i>EXL5</i></b> | 1.0                 | 1.0            | 1.0                 | 1.0            |

Affymetrix expression profiles from AtGenExpress (established by Hideki Goda, RIKEN, Japan) and two further profiles (*FEBS Let* 2004, **563**: 82-86) were analyzed using the stringent settings of the statistical algorithms of the GCOS software as described previously (*Nucleic Acids Res* 2005, **33**: 2685-2696). Wild-type plants (top) and the BR-deficient *det2* mutant plants (bottom) were analyzed. Signal log ratios (SLR) of treatment versus control are shown, a SLR of one corresponds to a two-fold change. *EXO*, *EXL1*, *EXL3*, and *EXL5* transcripts were called ‘Present’ at least in profiles of BR-treated plants according to the MAS5.0/GCOS algorithm. Change *P*-values (according to GCOS algorithm) were below 0.001 in all experiments. BL: brassinolide; EBL: 24-epibrassinolide; CS: castasterone. SLRs below 0.8 are not shown.

**Table S3. Fresh weight of wild-type and *exo* plants.**

|                   | WT        | <i>exo</i> | WT        | <i>exo</i> | WT        | <i>exo</i> |
|-------------------|-----------|------------|-----------|------------|-----------|------------|
|                   | Soil 32 d | Soil 35 d  | Soil 35 d | Soil 35 d  | Soil 35 d | Soil 35 d  |
| Fresh weight [mg] | 517       | 202        | 1268      | 520        | 701       | 263        |
| SD                | 47        | 33         | 303       | 126        | 31        | 50         |
| % WT              |           | <b>39</b>  |           | <b>41</b>  |           | <b>38</b>  |

  

|      | Soil 35 d         | Soil 35 d | Soil 35 d | Soil 35 d | Soil 35 d | Soil 35 d |
|------|-------------------|-----------|-----------|-----------|-----------|-----------|
|      | Fresh weight [mg] | 528       | 427       | 605       | 456       | 619       |
| SD   | 127               | 86        | 104       | 74        | 87        | 109       |
| % WT |                   | <b>81</b> |           | <b>75</b> |           | <b>72</b> |

Plants were grown in soil in six independent experiments. Student’s t-test *P*-values were below 0.05 in all experiments.

**Supplement to figure 5. Relative growth of wild-type, *exo*, and complemented *exo* plants (carrying the 35S::EXOga construct) in response to BL-treatments.**

|                  | Cotyledon length |            |                     | Cotyledon width |            |                     |
|------------------|------------------|------------|---------------------|-----------------|------------|---------------------|
|                  | WT               | <i>exo</i> | EXOga in <i>exo</i> | WT              | <i>exo</i> | EXOga in <i>exo</i> |
| <b>0 nM BL</b>   |                  |            |                     |                 |            |                     |
| Mean             | 100              | 100        | 100                 | 100             | 100        | 100                 |
| SD               | 11               | 11         | 11                  | 17              | 11         | 10                  |
| <b>1 nM BL</b>   |                  |            |                     |                 |            |                     |
| Mean             | 114              | 107        | 119                 | 102             | 102        | 110                 |
| SD               | 14               | 8          | 15                  | 11              | 10         | 11                  |
| <b>10 nM BL</b>  |                  |            |                     |                 |            |                     |
| Mean             | 122              | 109        | 128                 | 110             | 99         | 110                 |
| SD               | 16               | 10         | 14                  | 17              | 9          | 12                  |
| <b>100 nM BL</b> |                  |            |                     |                 |            |                     |
| Mean             | 119              | 105        | 124                 | 100             | 98         | 110                 |
| SD               | 14               | 9          | 17                  | 14              | 7          | 16                  |
|                  | Hypocotyl length |            |                     |                 |            |                     |
|                  | WT               | <i>exo</i> | EXOga in <i>exo</i> |                 |            |                     |
| <b>0 nM BL</b>   |                  |            |                     |                 |            |                     |
| Mean             | 100              | 100        | 100                 |                 |            |                     |
| SD               | 14               | 9          | 9                   |                 |            |                     |
| <b>1 nM BL</b>   |                  |            |                     |                 |            |                     |
| Mean             | 121              | 100        | 117                 |                 |            |                     |
| SD               | 16               | 17         | 24                  |                 |            |                     |
| <b>10 nM BL</b>  |                  |            |                     |                 |            |                     |
| Mean             | 163              | 115        | 135                 |                 |            |                     |
| SD               | 23               | 16         | 24                  |                 |            |                     |
| <b>100 nM BL</b> |                  |            |                     |                 |            |                     |
| Mean             | 197              | 170        | 176                 |                 |            |                     |
| SD               | 19               | 28         | 21                  |                 |            |                     |



|                  | WT  | Root length<br>exo | EXOga in<br>exo |
|------------------|-----|--------------------|-----------------|
| <b>0 nM BL</b>   |     |                    |                 |
| Mean             | 100 | 100                | 100             |
| SD               | 7   | 14                 | 8               |
| <b>1 nM BL</b>   |     |                    |                 |
| Mean             | 48  | 20                 | 43              |
| SD               | 11  | 5                  | 12              |
| <b>10 nM BL</b>  |     |                    |                 |
| Mean             | 42  | 18                 | 34              |
| SD               | 10  | 5                  | 9               |
| <b>100 nM BL</b> |     |                    |                 |
| Mean             | 37  | 12                 | 36              |
| SD               | 11  | 4                  | 9               |

BL treatments were compared to the respective control treatment (0 nM BL = 100%).

#### Supplement to figure 5. Statistical analysis (ANOVA).

|                         | Cotyledon length |         | Cotyledon width |         | Hypocotyl length |         | Root length |         |
|-------------------------|------------------|---------|-----------------|---------|------------------|---------|-------------|---------|
|                         | F-value          | P-value | F-value         | P-value | F-value          | P-value | F-value     | P-value |
| Genotype                | 544,634          | <0,001  | 306,826         | <0,001  | 15,064           | <0,001  | 791,265     | <0,001  |
| Treatment               | 71,127           | <0,001  | 8,366           | <0,001  | 540,574          | <0,001  | 2163,428    | <0,001  |
| Genotype x<br>treatment | 9,049            | <0,001  | 4,541           | <0,001  | 11,261           | <0,001  | 5,827       | <0,001  |

The ANOVA test was performed using the Holm-Sidak test.
